# Supplementary material for: Study on the Effect of EZH2 Inhibitor Combined with TIGIT Monoclonal Antibody against Multiple Myeloma Cells
Source: MDPI journal article supplement (doi:10.3390/ijms24108603), 2023-05-11
Supplement: s1 [file s1]

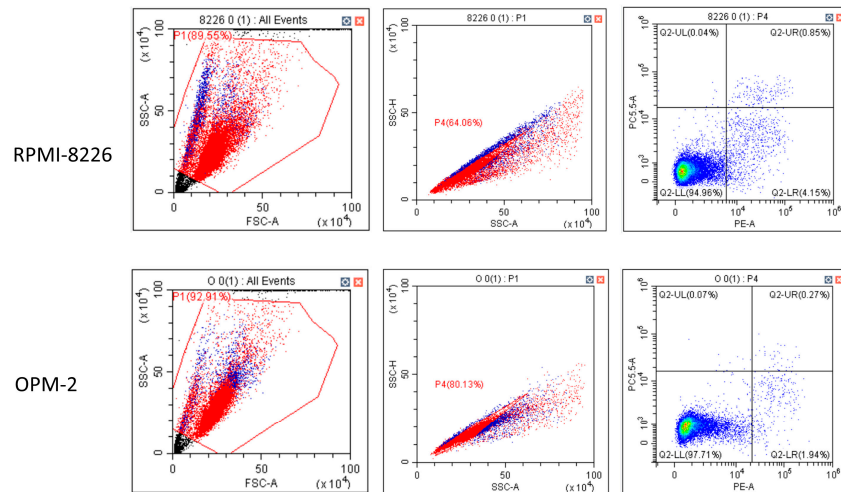

**Figure S1.** Gate strategy for selecting apoptosis of OPM2 and RPMI-8226 cells by flow cytometry.

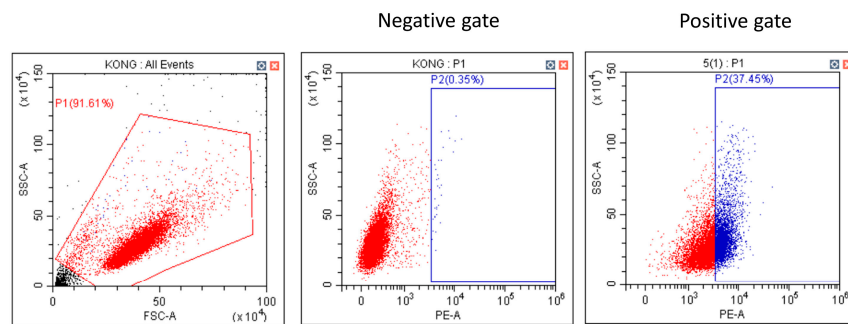

**Figure S2.** Gate strategy for detecting CD155, CD112 and CD113 expression on OPM2 cells by flow cytometry.

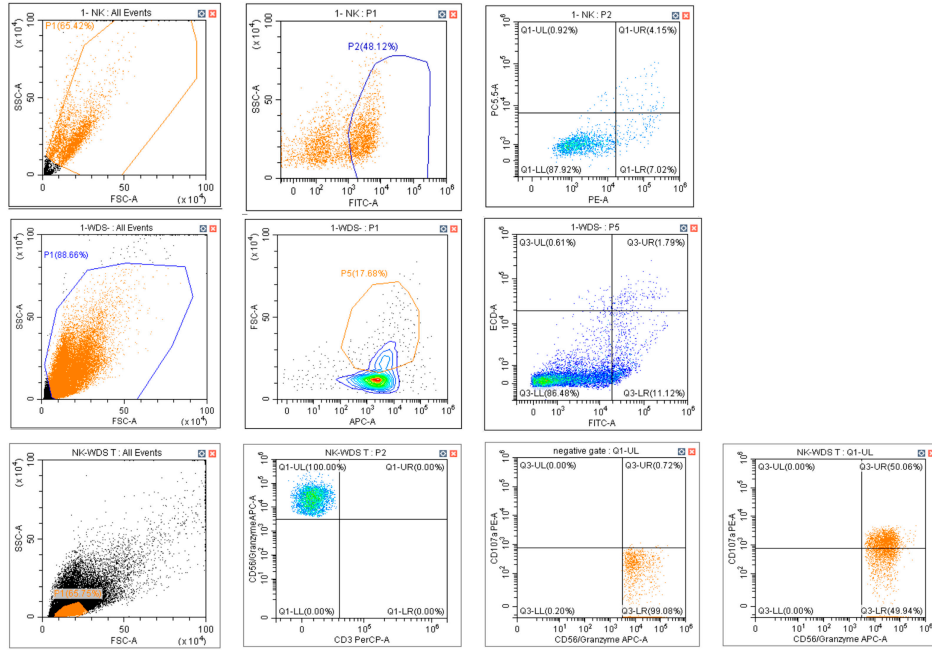

**Figure S3.** Gate strategy for detecting targeting cells apoptosis and NKP30 expression on NK cell surface in co-culture system by Flow cytometry.
